# Supplementary material for: Health System Barriers and Facilitators to Delivering Additional Vaccines through the National Immunisation Programme in China: A Qualitative Study of Provider and Service-User Perspectives
Source: MDPI journal article supplement (doi:10.3390/vaccines9050476), 2021-05-08
Supplement: s1 [file s1]

Table S1. EPI-provided and non-EPI vaccines available in China.

| EPI Vaccines                                                      | Non-EPI Vaccines                                                                            |
|-------------------------------------------------------------------|---------------------------------------------------------------------------------------------|
| AVA (Anthrax vaccine adsorbed)                                    | EV-71 (Enterovirus 71) vaccine                                                              |
| HFRS (Haemorrhagic fever with renal syndrome) vaccine             | Hib (Haemophilus influenzae type b) vaccine                                                 |
| BCG (Bacillus Calmette-Guerin) vaccine                            | HepE (Hepatitis E) vaccine                                                                  |
| DTP (Diphtheria, tetanus, and pertussis) vaccine                  | HPV (Human papillomavirus) vaccine                                                          |
| DT (Diphtheria and tetanus) vaccine                               | Influenza vaccine                                                                           |
| HepA (Hepatitis A) vaccine                                        | Leprosy vaccine                                                                             |
| HepB (Hepatitis B) vaccine                                        | OCV (Oral cholera vaccine)                                                                  |
| JE (Live attenuated Japanese encephalitis) vaccine                | PCV (Pneumococcal conjugate vaccine)                                                        |
| Leptospirosis vaccine                                             | DTaP-IPV-Hib (Diphtheria, tetanus, pertussis, polio, haemophilus influenzae Type b) vaccine |
| MMR (Measles, mumps and rubella) vaccine                          | Rabies vaccine                                                                              |
| MPV-A (Group A meningococcal polysaccharide vaccine)              | RV (Rotavirus vaccine)                                                                      |
| MPV-AC (Group A and group C meningococcal polysaccharide vaccine) | Tetanus vaccine                                                                             |
| MR (Measles-rubella) vaccine                                      | Varicella vaccine                                                                           |
| OPV (Oral polio vaccine)                                          |                                                                                             |

Table S2. Main socio-demographic indicators of study provinces in 2019.

| Indicator                                             | Guangdong<br>(Eastern) | Henan<br>(Central) | Sichuan<br>(Western) |
|-------------------------------------------------------|------------------------|--------------------|----------------------|
| Per capita GDP (RMB)                                  | 94,172                 | 56,388             | 55,774               |
| Life expectancy (year)                                | 76.5                   | 74.6               | 74.8                 |
| Maternal mortality rate (1/100,000)                   | 7.3                    | 9.2                | 10.9                 |
| Population (10,000 persons)                           | 11,521                 | 9,640              | 8,375                |
| Per capita disposable income of urban households(RMB) | 48,117.6               | 34,201.0           | 36,153.7             |
| Per capita disposable income of rural households(RMB) | 18,818.4               | 15,163.7           | 14,670.1             |

Note: Data source China Health Statistics Yearbook (2020).
